# Supplementary material for: TRIM25 predominately associates with anti-viral stress granules
Source: PubMed Central journal article supplement (PMC11096359; doi:10.1038/s41467-024-48596-4), 2024-05-15
Supplement: 41467_2024_48596_MOESM2_ESM.pdf [file 41467_2024_48596_MOESM2_ESM.pdf]

## **Description of Additional Supplementary Files**

File Name: Supplementary Data 1

Description: A list of G3BP1, TRIM25 and TRIM25 $\Delta$ PTFG proximity interacting proteins before and after Poly(I:C) treatment was identified by mass spectrometry. HEK293T cells were transfected with G3BP1-BirA\*, TRIM25-BirA\* and TRIM25 $\Delta$ PTFG-BirA\*. Protein components spatially localized to G3BP1 and TRIM25 were identified by mass spectrometry. Also included are our manually annotated 'Antiviral proteins'.
